# Supplementary material for: Andersen model factors, cancer symptom help-seeking, and psycho-physical health among patients with breast cancer: A cross-sectional mediation study
Source: Research Square preprint supplement (doi:10.21203/rs.3.rs-8227983/v1), 2025-12-22
Supplement: Supplementary file 1 [file 9bd0a679545db584dbc92cff.docx]

| **Dimensions** | **Item description** |
| --- | --- |
| Help-seeking Awareness (A) | A1: (R) When I notice a breast abnormality, I do not realize it may be related to breast cancer. |
| A2: I believe that seeking professional help promptly is important for breast cancer treatment and recovery. |
| A3: I monitor symptom changes during treatment so that I can seek help in a timely manner. |
| A4: I am aware that I will need more help in the upcoming phases of treatment. |
| Help-seeking Knowledge (B) | B1: (R) I am unclear about the channels for obtaining knowledge about breast cancer. |
| B2: I understand the help-seeking priorities at different treatment stages (preoperative, postoperative, chemotherapy, etc.). |
| B3: After discharge, I can obtain my physician’s contact to seek medical advice when needed. |
| Help-seeking Action (C) | C1: I present to a professional medical facility within one week after detecting a breast abnormality. |
| C2: (R) When I notice abnormal symptoms, I conceal them to avoid worrying my family or for other reasons. |
| C3: I prioritize tertiary hospitals or specialists in breast disease when seeking care. |
| C4: I proactively consult healthcare professionals to better understand how to manage symptoms during treatment. |
| Help-seeking Support (D) | D1: From the first visit to diagnosis, I additionally seek support from the professional medical team or peer patients. |
| D2: (R) During hospitalization, I did not receive help or support from fellow breast cancer patients. |
| D3: I plan to join patient support groups in the future to gain additional experience and information. |
